# Supplementary figures and images for: Dynamic laryngeal narrowing during exercise: a mechanism for generating intrinsic PEEP in COPD?
Source: HighWire-hosted journal article supplement (doi:10.1136/thoraxjnl-2014-205940), 2015-01-13

Figure E1:

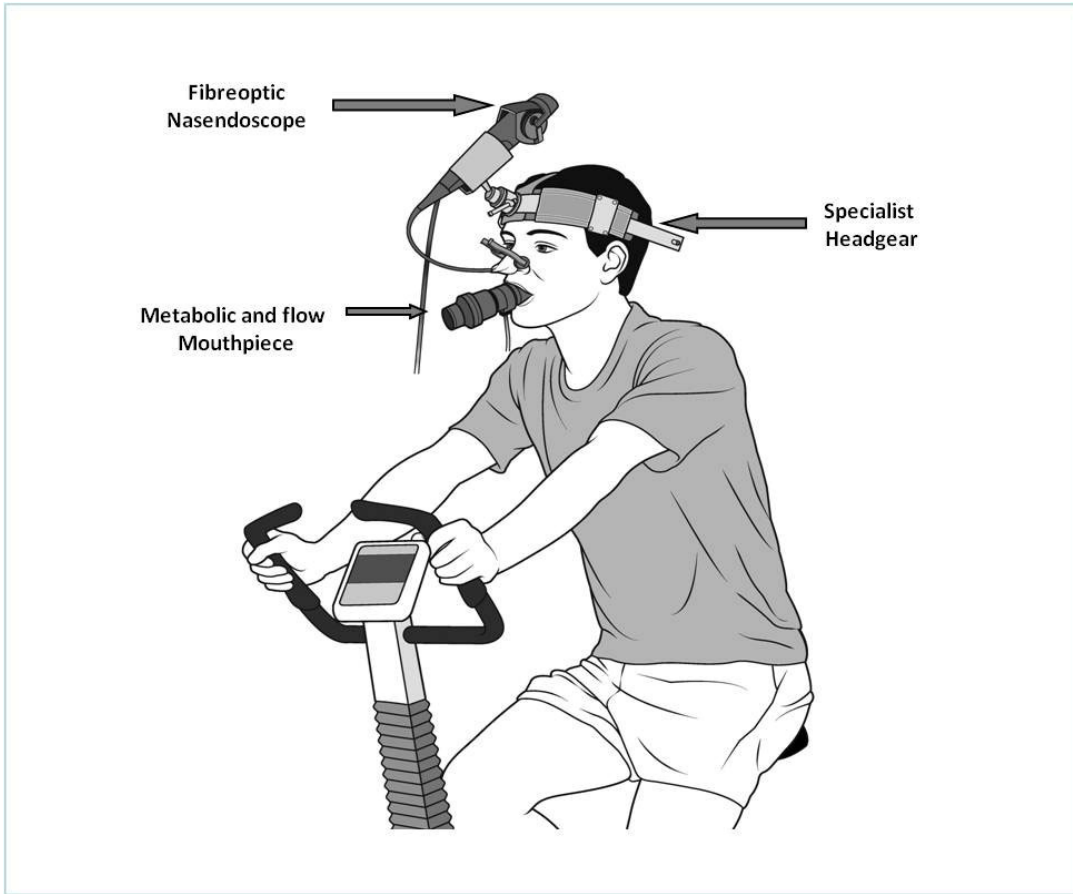

Figure E2:

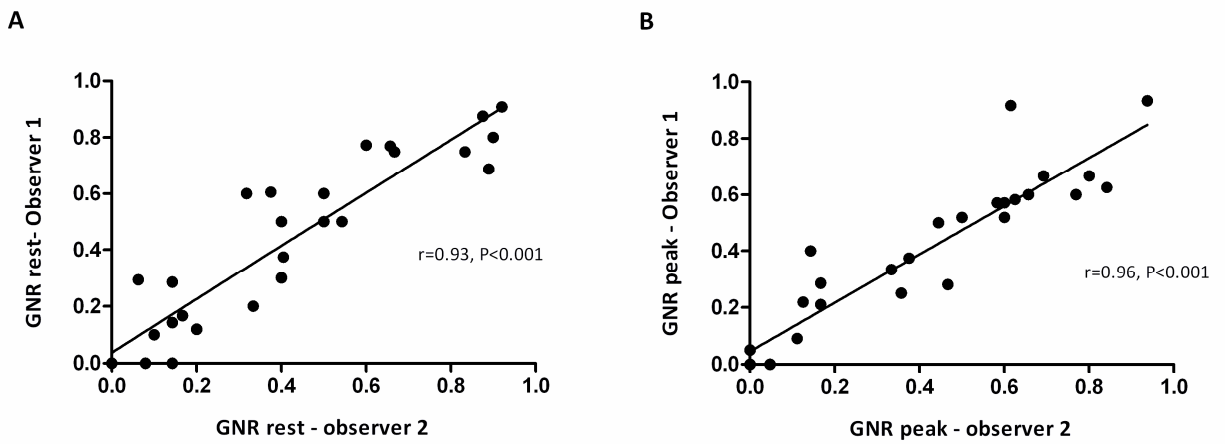

Supplement: thoraxjnl-2014-205940supp.pdf [file thoraxjnl-2014-205940supp.pdf]
